# Supplementary material
Source: publisher figshare collection journal article supplement (https://karger.figshare.com/ndownloader/files/12418175)
Supplement: Supplementary file 1 [file 12418175]

**Supplementary Table 1 – Basic demographic and laboratory parameters of the study population according to the pattern of elevated LFTs***

| P value | Mixed  (n=56) | Cholestatic (n=24) | Hepatocellular (n=28) |  |
| --- | --- | --- | --- | --- |
| P=0.002 | 47.9±13.4 | 57.5±10 | 45.7±12 | **Age (mean)** |
| ns | 46.4(26) | 50(12) | 42.9(12) | **Female (%)** |
| ns | 6.92±1.6 | 7.05±1.8 | 6.0±1.3 | **HA1c %(mean)** |
| P=0.014 | 209.1±125.8 | 141.8±59.9 | 152.6±82.3 | **Triglycerides (mg/dl) (mean)** |
| P<0.001 | 101.7±39.5 | 173.2±126.8 | 74.9±30.9 | **ALKP (U/L)** |
| ns | 258.4±498.6 | 289.8±385.9 | 64.4±41.2 | **GGT (U/L)** |
| P=0.01 | 61.2±49.4 | 41.8±25 | 81.7±53.9 | **AST (U/L)** |
| P<0.0001 | 75.0±31.4 | 39.0±28.2 | 134.8±61.7 | **ALT (U/L)** |
| P<0.0001 | 4.4±0.4 | 4.0±0.6 | 4.53±0.3 | **Albumin (g/dL)** |
| P=0.068 | 0.69±0.4 | 0.87±0.5 | 0.92±0.5 | **Total bilirubin (mg/dl)** |
| P=0.01 | 240500±71786 | 187250±92238 | 238464±56823 | **Thrombocytes (K/micl)** |
| P=0.02 | 1.04±0.1 | 1.14±0.2 | 1.03±0.1 | **INR** |

*The total number of patients in this analysis was 108, compared to 106 in the primary analysis. Two patients, who were excluded in the primary analysis as a result of normal enzymes, were included in the present analysis due to the change in the upper limit of normal ALT level.
